# Supplementary material for: Hyperbranched-polymer functionalization of graphene sheets for enhanced mechanical and dielectric properties of polyurethane composites
Source: Royal Society of Chemistry journal article supplement (doi:10.1039/c2jm16901k), 2012-01-01
Supplement: c2jm16901k.pdf [file c2jm16901k.pdf]

## Supporting Information

### Hyperbranched-polymer functionalization of graphene sheets for enhanced mechanical and dielectric properties of polyurethane composites

Chao Wu<sup>1</sup>, Xingyi Huang<sup>1\*</sup>, Genlin Wang<sup>1</sup>, Xingfeng Wu<sup>1</sup>, Ke, Yang,<sup>1</sup> Shengtao Li<sup>2</sup>, Pingkai Jiang<sup>1\*</sup>

<sup>1</sup>Department of Polymer Science and Engineering, Shanghai Key Lab of Electrical Insulation and Thermal Aging, Shanghai Jiao Tong University, Shanghai 200240, China.

<sup>2</sup>State Key Lab of Electrical Insulation and Power Equipment, Xi'an Jiaotong University, Xi'an, China

Corresponding author, Electronic mail: [xyhuang@sjtu.edu.cn](mailto:xyhuang@sjtu.edu.cn); [pkjiang@sjtu.edu.cn](mailto:pkjiang@sjtu.edu.cn)

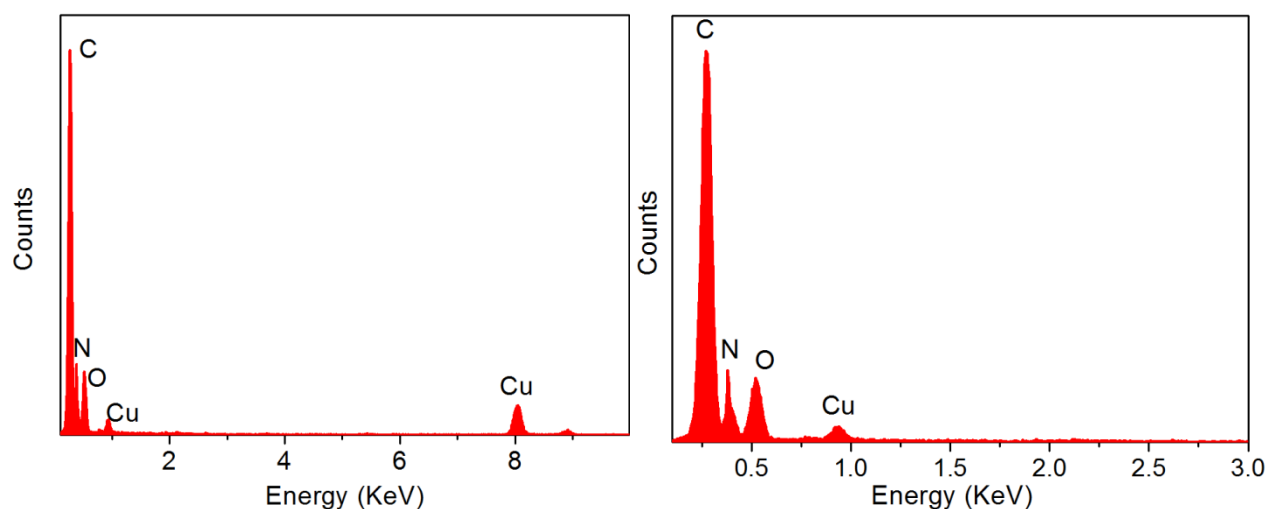

Figure S1 EDX spectra (left) and magnified EDX spectra (right) of GS-HBA

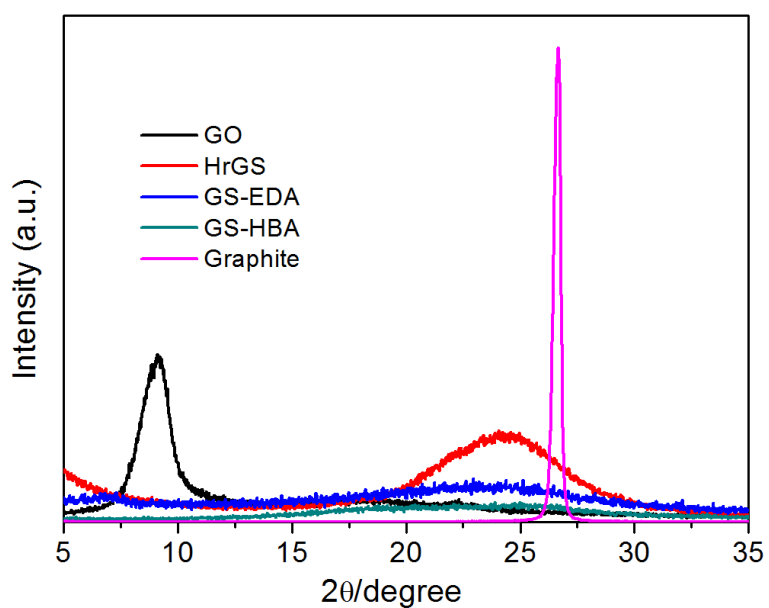

Figure S2. XRD patterns of GO, HrGS, GS-EDA, GS-HBA and Graphite.

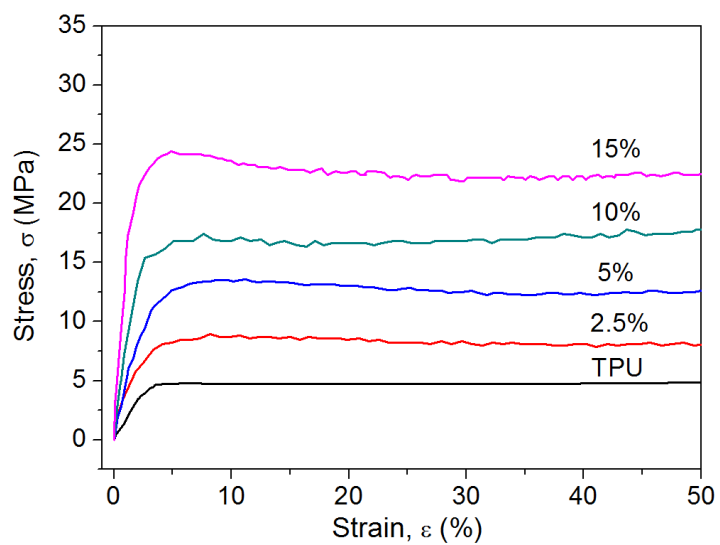

Figure S3. Representative stress-strain curves of TPU/GS-HBA composites in the low strain regime.

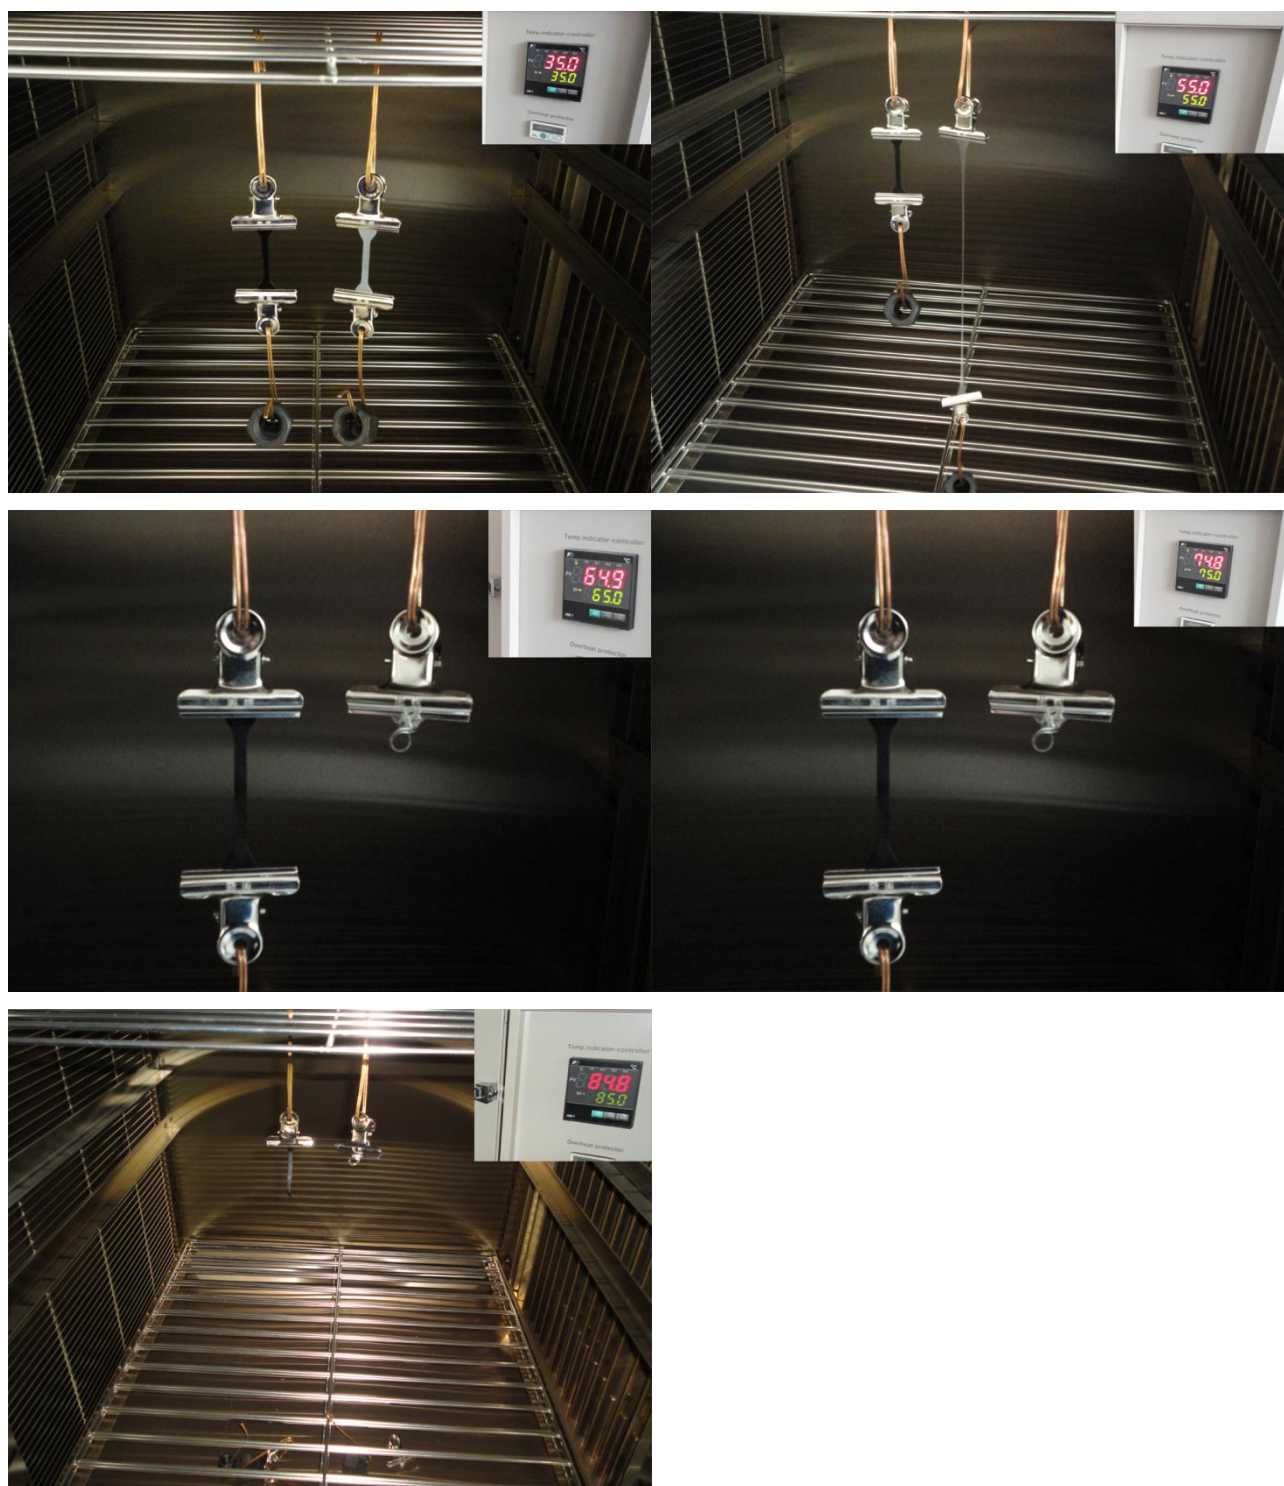

Figure S4. The photographs of mechanical behavior of the composite with 15 wt% GS-HBA (left) and the pure TPU (right) at different temperature.

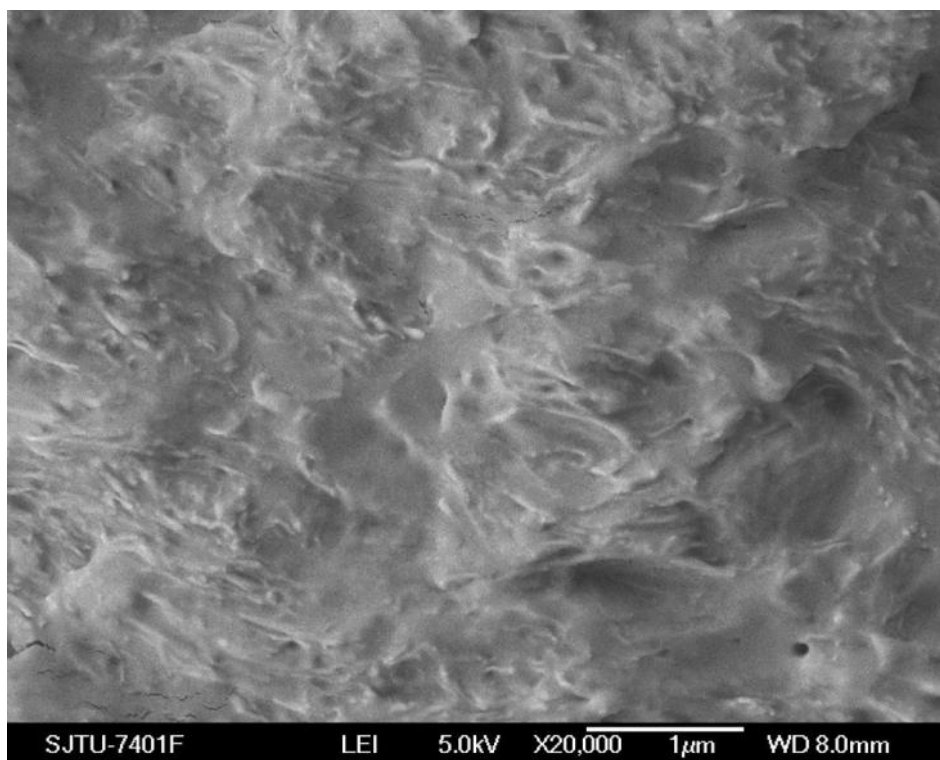

Figure S5. SEM image of the fracture surface of the composite with 15 wt% GS-HBA.

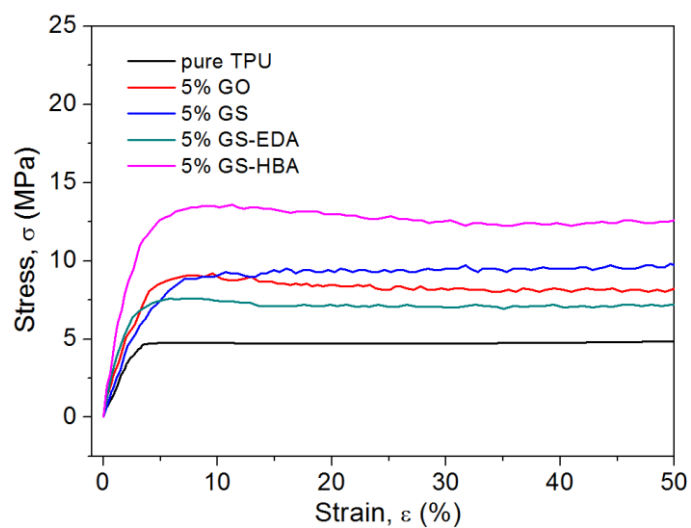

Figure S6. Representative stress-strain curves of pure TPU and its composites with HrGS and functionalized GSs in the low strain regime.

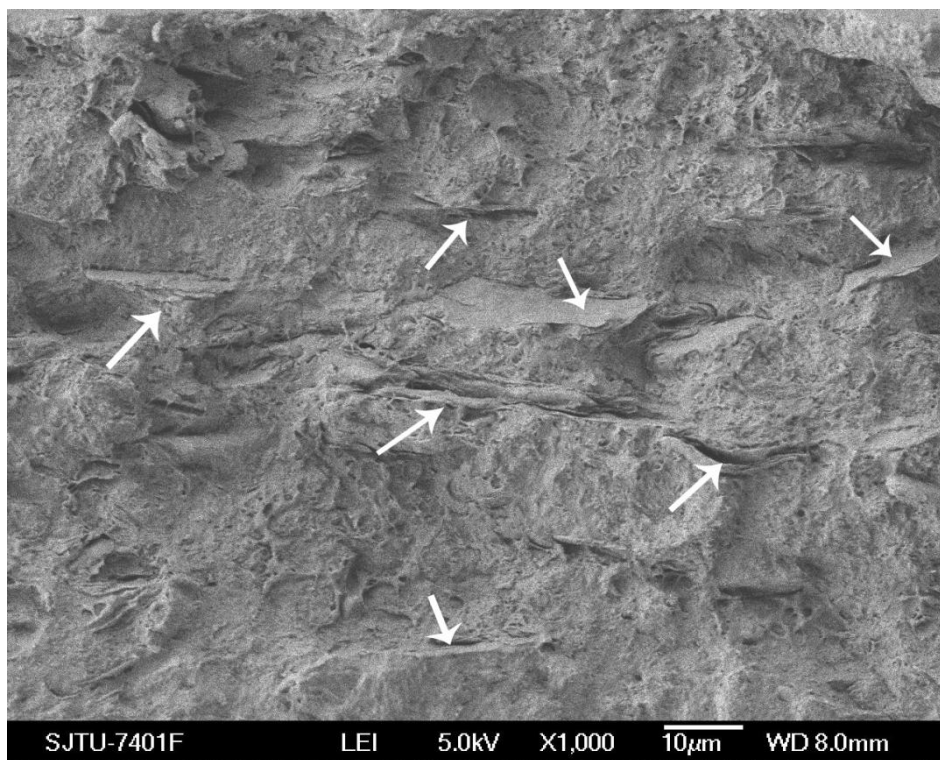

Figure S7. SEM image of the fracture surface of the composite with 5 wt% HrGS.



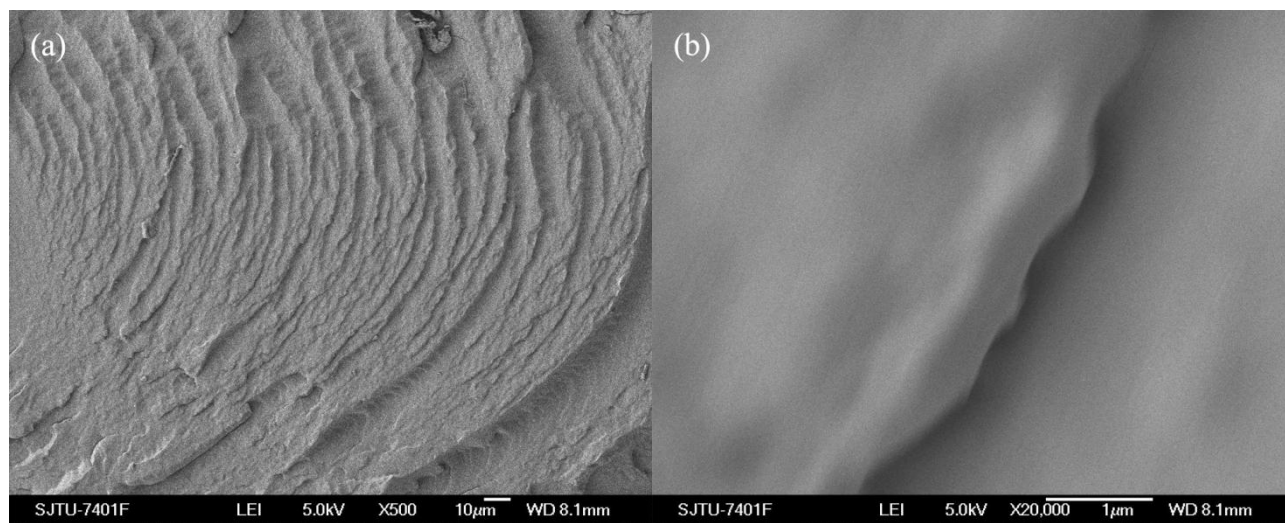

Figure S8. SEM images of the fracture surface of pure TPU.

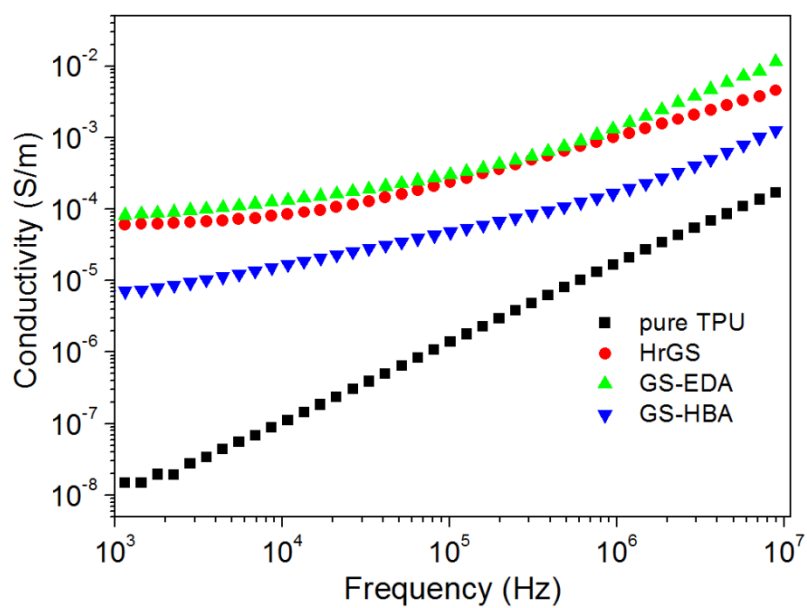

Figure S9. Frequency response of ac conductivity of pure TPU and the HrGS, GS-EDA and GS-HBA composites with the same content (5 wt%) of graphene backbone.
